# Supplementary material for: Seed Biofortification and Phytic Acid Reduction: A Conflict of Interest for the Plant?
Source: PubMed Central journal article supplement (PMC4844270; doi:10.3390/plants4040728), 2015-11-20
Supplement: plants-04-00728-s001.pdf [file plants-04-00728-s001.pdf]

# Supplementary Materials

**Table S1.** Summary of the *lpa* mutants isolated in different species. nd, not determined; OE, overexpression; RNAi, RNA interference.

| Gene Function | Species                     | Locus         | Origin of Mutation                      | Mutant (Ecotype)                                                        | Seed PA Reduction | Metabolites and/or Genes DOWN Regulated                                                                                | Metabolites and/or Genes UP Regulated | Other Phenotypic Alterations                                                                                                                                                                                                                                                                         | Ref.    |
|---------------|-----------------------------|---------------|-----------------------------------------|-------------------------------------------------------------------------|-------------------|------------------------------------------------------------------------------------------------------------------------|---------------------------------------|------------------------------------------------------------------------------------------------------------------------------------------------------------------------------------------------------------------------------------------------------------------------------------------------------|---------|
| MIPS1         | <i>Arabidopsis thaliana</i> | At4g39800     | T-DNA insertion                         | <i>atips1-1</i> (Col),<br><i>atips1-2</i> (Ws)                          | nd                | phytic acid, <i>myo</i> -inositol and galactinol in leaves                                                             |                                       | reduced cell proliferation in seedling causing strong modification of the root cap and shorter seedling; abnormal cotyledons; leaf lesions on adult plants modulated by light intensity and developmental stages, due to SA-dependent PCD (increase in SA content); increased resistance to oomycete | [1,2]   |
| MIPS1         | <i>Arabidopsis thaliana</i> | At4g39800     | T-DNA insertion                         | <i>mips1-2</i> (Col),<br><i>mips1-4</i> (C-24),<br><i>mips1-5</i> (Col) | nd                |                                                                                                                        |                                       | defects in: embryogenesis, cotyledon vein patterning, epidermal cell division, root growth and gravitropism, root cap cell patterning, apical dominance, auxin response                                                                                                                              | [3]     |
| MIPS1         | <i>Arabidopsis thaliana</i> | At4g39800     | T-DNA insertion                         | <i>mips1-2</i> (Col),<br><i>mips1-3</i> (Col)                           | nd                | <i>myo</i> -inositol, ascorbic acid, phosphatidyl inositols                                                            | ceramides                             | smaller plants, curly leaves, spontaneous lesions, increased sensitivity to ABA and NaCl in germination                                                                                                                                                                                              | [4]     |
| MIPS2         | <i>Arabidopsis thaliana</i> | At2g22240     | T-DNA insertion                         | <i>atips2</i> (Col)                                                     | none              | phytic acid in leaves                                                                                                  |                                       | increased susceptibility to viruses, fungi, bacteria                                                                                                                                                                                                                                                 | [1,5,6] |
| MIPS3         | <i>Arabidopsis thaliana</i> | At5g10170     | T-DNA insertion                         | <i>atips3</i> (Col)                                                     | none              |                                                                                                                        |                                       | lethal                                                                                                                                                                                                                                                                                               | [2,5,6] |
| MIPS1         | <i>Glycine max</i>          | Glyma18g02210 | $\gamma$ -rays                          | <i>Gm-lpa-TW75-1</i>                                                    | 50%               | <i>myo</i> -inositol, galactinol, raffinose, stachyose, galactopinitol A, galactopinitol B, fagopyritol B1, galactinol | sucrose, glycerol, sorbitol           | reduced field emergence (seeds produced in subtropical environment)                                                                                                                                                                                                                                  | [7–9]   |
| MIPS1         | <i>Glycine max</i>          | Glyma18g02210 | <i>N</i> -nitroso- <i>N</i> -methylurea | <i>LR33</i>                                                             | 50%               | <i>myo</i> -inositol, raffinose, stachyose                                                                             | sucrose                               | reduced field emergence (seeds produced in subtropical environment)                                                                                                                                                                                                                                  | [10,11] |

Table S1. Cont.

| Gene Function                   | Species                     | Locus                          | Origin of Mutation            | Mutant (Ecotype)                                                                           | Seed PA Reduction | Metabolites and/or Genes DOWN Regulated                                                                             | Metabolites and/or Genes UP Regulated                                     | Other Phenotypic Alterations                                                                                                                                                      | Ref.    |
|---------------------------------|-----------------------------|--------------------------------|-------------------------------|--------------------------------------------------------------------------------------------|-------------------|---------------------------------------------------------------------------------------------------------------------|---------------------------------------------------------------------------|-----------------------------------------------------------------------------------------------------------------------------------------------------------------------------------|---------|
| MIPS1                           | <i>Glycine max</i>          | Glyma18g02211                  |                               | V99-5089                                                                                   | 50%               |                                                                                                                     | sucrose                                                                   |                                                                                                                                                                                   | [12,13] |
| MIPS1                           | <i>Glycine max</i>          | Glyma18g02212                  | RNAi                          | $\Delta GmMIPS$                                                                            | 35%–95%           |                                                                                                                     |                                                                           | seed abortion in fully silenced seeds                                                                                                                                             | [14]    |
| MIPS                            | <i>Solanum tuberosum</i>    |                                | antisense                     | antisense <i>StIPS</i>                                                                     | nd                | Phytic acid in tubers, <i>myo</i> -inositol (leaf and tuber), galactinol, raffinose (leaf), sucrose, starch (tuber) | sucrose, starch (leaf)                                                    | reduced apical dominance, delayed flowering, increased leaf thickness, precocious leaf senescence, mini tubers, no anthocyanins in tuber skin, increased susceptibility to virus  | [1,15]  |
| MIPS                            | <i>Oryza sativa</i>         | Os03g09250                     | antisense                     | antisense <i>RINO1</i> under olesin 18kDa promoter ( <i>Ole18</i> )                        | 75%               |                                                                                                                     |                                                                           | affected only embryo and aleurone layer; no negative effects on seed weight, germination and plant growth                                                                         | [16]    |
| IMP                             | <i>Arabidopsis thaliana</i> | At3g02870                      | T-DNA insertion               | <i>vtc4</i>                                                                                | nd                | <i>myo</i> -inositol, ascorbic acid                                                                                 | galactose                                                                 |                                                                                                                                                                                   | [17]    |
| IMT from <i>M. crystallinum</i> | <i>Brassica napus</i>       |                                | over-expression               | pNIMT ( <i>IMT</i> under napin promoter) and pPhIMT ( <i>IMT</i> under phaseolin promoter) | 20%–30%           | galactinol, raffinose                                                                                               | galactose, stachyose, sucrose                                             |                                                                                                                                                                                   | [18]    |
| MIK                             | <i>Arabidopsis thaliana</i> | At5g58730                      | T-DNA insertion               | <i>atmik-1</i>                                                                             | 62%               | IPK2 $\beta$ , ITPK1, ITPK4, MRP, 2PGK                                                                              |                                                                           | reduced germination on NaCl, mannitol, H <sub>2</sub> O <sub>2</sub>                                                                                                              | [5]     |
| MIK                             | <i>Arabidopsis thaliana</i> | At5g58730                      | T-DNA insertion               | <i>atmik-2</i>                                                                             | 66%               |                                                                                                                     |                                                                           |                                                                                                                                                                                   | [5]     |
| MIK                             | <i>Zea mays</i>             | GRMZM2G361593                  | <i>Mu</i> insertion           | <i>lpa3</i>                                                                                | 45%               | lower InsPs                                                                                                         | <i>myo</i> -inositol                                                      |                                                                                                                                                                                   | [19]    |
| MIK + ITPK                      | <i>Zea mays</i>             | GRMZM2G361593<br>GRMZM2G456626 | <i>Mu</i> insertion           | <i>lpa2-lpa3</i>                                                                           | 66%               |                                                                                                                     | molar increase of lower InsPs                                             |                                                                                                                                                                                   | [19]    |
| MIK                             | <i>Oryza sativa</i>         | Os03g52760                     | $\gamma$ -rays + sodium azide | <i>Os-lpa-XS110-1</i>                                                                      | 64%               | InsP                                                                                                                | <i>myo</i> -inositol, raffinose, galactose, galactinol, fructose, glucose | seed dry weight reduction, low grain yield, reduced germination (particularly after aging), reduced field emergence. Proteomic study shows 23 proteins UP-regulated in the mutant | [20–23] |
| MIK                             | <i>Oryza sativa</i>         |                                | EMS                           | <i>lpa N15-186</i>                                                                         | 75%               |                                                                                                                     | <i>myo</i> -inositol                                                      |                                                                                                                                                                                   | [24]    |

Table S1. Cont.

| Gene Function | Species                     | Locus         | Origin of Mutation  | Mutant (Ecotype)                | Seed PA Reduction | Metabolites and/or Genes DOWN Regulated | Metabolites and/or Genes UP Regulated  | Other Phenotypic Alterations                                                                                                                                       | Ref.    |
|---------------|-----------------------------|---------------|---------------------|---------------------------------|-------------------|-----------------------------------------|----------------------------------------|--------------------------------------------------------------------------------------------------------------------------------------------------------------------|---------|
| 2-PGK         | <i>Arabidopsis thaliana</i> | At5g60760     | T-DNA insertion     | <i>Oslpa1 like</i>              | 66%               | MIK, ITPK1, ITPK4, MRP                  | IPK2 $\beta$ , IPK1                    | reduced germination on NaCl, mannitol, H <sub>2</sub> O <sub>2</sub>                                                                                               | [25,5]  |
| 2-PGK         | <i>Oryza sativa</i>         | Os02g57400    | $\gamma$ -rays      | <i>XQZ-1</i>                    | 40%               |                                         | molar increase of lower InsPs          | seed dry weight reduction, low grain yield, reduced germination (particularly after aging)                                                                         | [22]    |
| 2-PGK         | <i>Oryza sativa</i>         | Os02g57400    | $\gamma$ -rays      | <i>KBNT lpa1-1</i>              | 40%               |                                         | molar increase of lower InsPs          | normal plants, reduced size of globoids                                                                                                                            | [24]    |
| IPK2 $\beta$  | <i>Arabidopsis thaliana</i> | At5g61760     | T-DNA insertion     | <i>ipk2<math>\beta</math>-1</i> | 35%               |                                         |                                        |                                                                                                                                                                    | [26]    |
| IPK2 $\beta$  | <i>Arabidopsis thaliana</i> | At5g61760     |                     | <i>ipk2<math>\beta</math>-2</i> | 48%               | MIK, ITPK1, ITPK4, 2PGK                 | IPK1, MRP                              | reduced germination on NaCl, mannitol, H <sub>2</sub> O <sub>2</sub>                                                                                               | [5]     |
| ITPK1         | <i>Arabidopsis thaliana</i> | At5g16760     | T-DNA insertion     | <i>atitpk1</i>                  | 46%               | MIK, 2PGK                               | IPK1, MRP                              | reduced germination on NaCl, mannitol, H <sub>2</sub> O <sub>2</sub>                                                                                               | [5]     |
| ITPK4         | <i>Arabidopsis thaliana</i> | At2g43980     | T-DNA insertion     | <i>atitpk4-1</i>                | 51%               | MIK, 2PGK                               | IPK1, MRP                              | reduced germination on NaCl, mannitol, H <sub>2</sub> O <sub>2</sub>                                                                                               | [5]     |
| ITPK4         | <i>Arabidopsis thaliana</i> | At2g43980     | T-DNA insertion     | <i>atitpk4-2</i>                | 40%               |                                         |                                        |                                                                                                                                                                    | [5]     |
| ITPK          | <i>Zea mays</i>             | GRMZM2G456626 | <i>Mu</i> insertion | <i>lpa2</i>                     | 30%               |                                         | molar increase of lower InsPs          | seed dry weight reduction                                                                                                                                          | [27,28] |
| ITPK          | <i>Oryza sativa</i>         | Os09g34300    | EMS                 | <i>itpk</i>                     | 46%–68%           |                                         |                                        | seed dry weight reduction, low grain yield, reduced germination                                                                                                    | [29]    |
| IPK1          | <i>Arabidopsis thaliana</i> | At5g42810     | T-DNA insertion     | <i>ipk1-1</i>                   | 83%               |                                         |                                        | altered Pi homeostasis (smaller leaves and epinasty at standard Pi concentration, longer roots at lower Pi concentration, attenuated ability to sense Pi increase) | [26]    |
| IPK1          | <i>Arabidopsis thaliana</i> | At5g42810     | T-DNA insertion     | <i>ipk1-1</i>                   | 49%               | MIK                                     | IPK2 $\beta$ , ITPK1, ITPK4, MRP, 2PGK | reduced germination on NaCl, mannitol, H <sub>2</sub> O <sub>2</sub>                                                                                               | [5]     |
| IPK1          | <i>Arabidopsis thaliana</i> | At5g42810     | T-DNA insertion     | <i>ipk1-1</i>                   | nd                | phytic acid in leaves                   |                                        | increased susceptibility to viruses, fungi, bacteria                                                                                                               | [1]     |

Table S1. *Cont.*

| Gene Function | Species                     | Locus         | Origin of Mutation             | Mutant (Ecotype)     | Seed PA Reduction | Metabolites and/or Genes DOWN Regulated | Metabolites and/or Genes UP Regulated                                                 | Other Phenotypic Alterations                                                                                                                                                                                     | Ref. |
|---------------|-----------------------------|---------------|--------------------------------|----------------------|-------------------|-----------------------------------------|---------------------------------------------------------------------------------------|------------------------------------------------------------------------------------------------------------------------------------------------------------------------------------------------------------------|------|
| IPK1          | <i>Arabidopsis thaliana</i> | At5g42810     | T-DNA insertion                | <i>ipk1-1</i>        | nd                |                                         |                                                                                       | increased Pi uptake and increased root to shoot translocation, Pi deficiency-like root system architecture                                                                                                       | [30] |
| IPK1          | <i>Arabidopsis thaliana</i> | At5g42810     | T-DNA insertion                | <i>ipk1-1</i>        | nd                |                                         |                                                                                       | early flowering, seed yield 52% of wt, reduced sensitivity to salt stress                                                                                                                                        | [31] |
| IPK1          | <i>Arabidopsis thaliana</i> | At5g42810     | T-DNA insertion                | <i>ipk1-2</i>        | nd                |                                         |                                                                                       | not viable                                                                                                                                                                                                       | [30] |
| IPK1          | <i>Glycine max</i>          | Glyma14g07880 | $\gamma$ -rays                 | <i>Gm-lpa-ZC-2</i>   | 46%               |                                         | <i>myo</i> -inositol, syringic acid, total isoflavones, molar increase of lower InsPs | shorter plants, but no yield reduction                                                                                                                                                                           | [7]  |
| IPK1          | <i>Zea mays</i>             | GRMZM2G067299 | ZFN-DNA editing                | <i>ipk1</i>          | 50%               |                                         |                                                                                       |                                                                                                                                                                                                                  | [32] |
| IPK1          | <i>Oryza sativa</i>         | Os04g56580    | RNAi under Oleosin 18 promoter | <i>ipk1</i>          | 70%               |                                         |                                                                                       | unchanged levels of <i>myo</i> -inositol                                                                                                                                                                         | [33] |
| MRP           | <i>Arabidopsis thaliana</i> | At1g04120     | T-DNA insertion                | <i>atmrp5-1</i> (Ws) | nd                |                                         |                                                                                       | on 0.5 $\times$ MS decreased root growth and increased lateral root formation, on 1 $\times$ MS reverse phenotype, increased level of auxin in root, no effect of sulfonylurea glibenclamide on stomatal opening | [34] |

Table S1. Cont.

| Gene Function | Species                     | Locus                          | Origin of Mutation | Mutant (Ecotype)                        | Seed PA Reduction | Metabolites and/or Genes DOWN Regulated                                                       | Metabolites and/or Genes UP Regulated | Other Phenotypic Alterations                                                                                                                                                                                                                                 | Ref.           |
|---------------|-----------------------------|--------------------------------|--------------------|-----------------------------------------|-------------------|-----------------------------------------------------------------------------------------------|---------------------------------------|--------------------------------------------------------------------------------------------------------------------------------------------------------------------------------------------------------------------------------------------------------------|----------------|
| MRP           | <i>Arabidopsis thaliana</i> | At1g04120                      | T-DNA insertion    | <i>atmrp5-1</i> (Ws)                    | nd                |                                                                                               |                                       | more resistant to drought stress, increased water use efficiency, stomata closer under light, no sensitivity to Ca <sup>2+</sup> and ABA on stomatal closure, no sensitivity to auxin for opening under darkness, reduced ABA sensitivity during germination | [35]           |
| MRP           | <i>Arabidopsis thaliana</i> | At1g04120                      | T-DNA insertion    | <i>atmrp5-1</i> (Ws)                    | nd                |                                                                                               |                                       | impairment in activation of slow S-type anion channels in the plasma membrane of GCs                                                                                                                                                                         | [36]           |
| MRP           | <i>Arabidopsis thaliana</i> | At1g04120                      | T-DNA insertion    | <i>atmrp5-2</i> (Ws)                    | nd                |                                                                                               |                                       | hypersensitivity to salt stress                                                                                                                                                                                                                              | [37]           |
| MRP           | <i>Arabidopsis thaliana</i> | At1g04120                      | T-DNA insertion    | <i>mrp5-1</i> (Ws), <i>mrp5-2</i> (Col) | 73%–80%           | 34%–37% reduction in total P; reduction in Na, Mg, Ca, K content                              |                                       |                                                                                                                                                                                                                                                              | [38]           |
| MRP           | <i>Arabidopsis thaliana</i> | At1g04120                      | T-DNA insertion    | <i>atmrp5-1 and 5-2</i> (Col)           | 73%–80%           | MIK, IPK2, ITPK1, ITPK4, 2PGK                                                                 | IPK1                                  | reduced germination on NaCl, mannitol, H <sub>2</sub> O <sub>2</sub>                                                                                                                                                                                         | [5]            |
| MRP           | <i>Arabidopsis thaliana</i> | At1g04120                      | T-DNA insertion    | <i>atmrp5</i> (Col)                     | nd                |                                                                                               |                                       | enhanced lateral roots and root hair growth                                                                                                                                                                                                                  | [30]           |
| MRP           | <i>Arabidopsis thaliana</i> | At1g04120                      | T-DNA insertion    | <i>atmrp5</i>                           | nd                |                                                                                               |                                       | increase in InsP5, InsP7 and InsP8 in siliques                                                                                                                                                                                                               | [39]           |
| MRP           | <i>Glycine max</i>          | Glyma03g32500<br>Glyma19g35230 | EMS                | <i>CX1834</i>                           | 80%               | palmitate, stearate, oil                                                                      |                                       | reduced seedling and field emergence (seeds produced in subtropical environment)                                                                                                                                                                             | [12,13, 40–43] |
| MRP           | <i>Phaseolus vulgaris</i>   | Phvul001g165500                | EMS                | <i>lpa1</i>                             | 90%               | <i>myo</i> -inositol, raffinose, raffinobiosaccharides, MIPS, IMP, IPK2, ITPK $\alpha$ , IPK1 |                                       | down-regulation of genes (MIPS, IMP, IPK2, ITPK $\alpha$ , IPK1) for PA biosynthetic pathway, germination hypersensitivity to ABA                                                                                                                            | [44]           |

Table S1. Cont.

| Gene Function | Species                     | Locus         | Origin of Mutation            | Mutant (Ecotype)        | Seed PA Reduction | Metabolites and/or Genes DOWN Regulated    | Metabolites and/or Genes UP Regulated                                   | Other Phenotypic Alterations                                                                                                                                                                                                      | Ref.           |
|---------------|-----------------------------|---------------|-------------------------------|-------------------------|-------------------|--------------------------------------------|-------------------------------------------------------------------------|-----------------------------------------------------------------------------------------------------------------------------------------------------------------------------------------------------------------------------------|----------------|
| MRP           | <i>Zea mays</i>             | GRMZM5G820122 | EMS                           | <i>lpa1-241, lpa1-7</i> | 90%               | <i>myo</i> -inositol, MIPS                 | Mg, K                                                                   | seed dry weight reduction, down-regulation of MIPS, altered morphology of globoids (number and size), altered embryo development, size, germination, seedling growth rate, ear size, increased susceptibility to oxidative stress | [45–50]        |
| MRP           | <i>Zea mays</i>             | GRMZM5G820123 | EMS                           | <i>lpa1-1</i>           | 66%               | MIPS                                       | <i>myo</i> -inositol                                                    | reduced germination, reduced vigour under stress conditions, altered morphology of globoids (number and size)                                                                                                                     | [27,32, 51–53] |
| MRP           | <i>Oryza sativa</i>         | Os03g04920    | $\gamma$ -rays + sodium azide | <i>Os-lpa-XS110-2</i>   | 20%               | <i>myo</i> -inositol, raffinose, galactose | 24-methylencycloartanol (steroid)                                       | seed dry weight reduction, low grain yield, reduced germination (particularly after aging), reduced field emergence.                                                                                                              | [20–22, 54]    |
| MRP           | <i>Oryza sativa</i>         | Os03g04920    | $\gamma$ -rays + sodium azide | <i>Os-lpa-XS110-3</i>   | 100%              |                                            | <i>myo</i> -inositol                                                    | (lethal)                                                                                                                                                                                                                          | [20,54]        |
| MRP           | <i>Oryza sativa</i>         | Os03g04920    | T-DNA insertion               | <i>4A-02500</i>         | 90%               |                                            | <i>myo</i> -inositol                                                    | (lethal)                                                                                                                                                                                                                          | [20,53]        |
| PAP           | <i>Arabidopsis thaliana</i> | At3g07130     | over-expression               | <i>OE-PAP15</i>         | nd                | phytic acid in leaves                      | ascorbic acid                                                           | altered salt, osmotic stress, and ABA sensitivities, enhanced salt tolerance, and decreased abscisic acid sensitivity                                                                                                             | [55]           |
| Sultr3;3      | <i>Hordeum vulgare</i>      |               | sodium azide                  | <i>lpa1-1 (M422)</i>    | 50%               | IMP                                        | Increase in free Pi and small increases in Ins(1,2,3,4,6)P <sub>5</sub> | reduced test weight and percentage plump kernels, mutation affects only aleurone. Breeding can abolish/reduce negative traits                                                                                                     | [56–60]        |
| Sultr3;3      | <i>Oryza sativa</i>         | Os04g0652400  | $\gamma$ -rays                | <i>MH86-1</i>           | 44%               |                                            | molar increase in free Pi                                               | seed dry weight reduction, low grain yield, reduced germination (particularly after aging)                                                                                                                                        | [20,22]        |

Table S1. *Cont.*

| Gene Function | Species                | Locus   | Origin of Mutation | Mutant (Ecotype)                       | Seed PA Reduction | Metabolites and/or Genes DOWN Regulated | Metabolites and/or Genes UP Regulated                   | Other Phenotypic Alterations                                                                                       | Ref.              |
|---------------|------------------------|---------|--------------------|----------------------------------------|-------------------|-----------------------------------------|---------------------------------------------------------|--------------------------------------------------------------------------------------------------------------------|-------------------|
| unknown       | <i>Pisum sativum</i>   | unknown | EMS                | <i>1-150-81</i> ;<br><i>1-2347-144</i> | 60%–65%           |                                         | molar increase<br>in free Pi                            | decreased seed weight, decreased yield                                                                             | [61,62]           |
| unknown       | <i>Hordeum vulgare</i> | unknown | sodium azide       | <i>lpa3-3 (M635)</i>                   | 65%               | IMP, MIPS                               | <i>myo</i> -inositol,<br>galactinol                     | reduced test weight and percentage<br>plump kernels, reduced yield. Breeding<br>can abolish/reduce negative traits | [56–59]           |
| unknown       | <i>Hordeum vulgare</i> | unknown | sodium azide       | <i>M955</i>                            | 90%               | IMP, MIPS                               | <i>myo</i> -inositol, raffinose,<br>galactinol, sucrose | reduced test weight and percentage<br>plump kernels, reduced yield. Breeding<br>can abolish/reduce negative traits | [56,57,<br>59,63] |
| unknown       | <i>Oryza sativa</i>    | unknown | $\gamma$ -rays     | <i>Z9B-1</i>                           | 45%               |                                         | low increase<br>in free Pi                              | seed dry weight reduction, low grain<br>yield, reduced germination (particularly<br>after aging)                   | [20,22]           |

## References

1. Murphy, A.; Otto, B.; Brearley, C.; Carr, J.; Hanke, D. A role for inositol hexakisphosphate in the maintenance of basal resistance to plant pathogens. *Plant J.* **2008**, *56*, 638–652.
2. Meng, P.; Raynaud, C.; Tcherkez, G.; Blanchet, S.; Massoud, K.; Domenichini, S.; Henry, Y.; Soubigou-Taconnat, L.; Lelarge-Trouverie, C.; Saindrenan, P.; *et al.* Crosstalks between *myo*-inositol metabolism, programmed cell death and basal immunity in *Arabidopsis*. *PLoS ONE* **2009**, *4*, doi:10.1371/journal.pone.0007364.
3. Chen, H.; Xiong, L. *Myo*-inositol-1-phosphate synthase is required for polar auxin transport and organ development. *J. Biol. Chem.* **2010**, *285*, 24238–24247.
4. Donahue, J.; Alford, S.; Torabinejad, J.; Kerwin, R.; Nourbakhsh, A.; Ray, W.; Hernick, M.; Huang, X.; Lyons, B.; Hein, P.; *et al.* The *Arabidopsis thaliana myo*-inositol 1-phosphate synthase1 gene is required for *myo*-inositol synthesis and suppression of cell death. *Plant Cell* **2010**, *22*, 888–903.
5. Kim, S.; Tai, T. Identification of genes necessary for wild-type levels of seed phytic acid in *Arabidopsis thaliana* using a reverse genetics approach. *Mol. Genet. Genom.* **2011**, *286*, 119–133.
6. Luo, Y.; Qin, G.; Zhang, J.; Liang, Y.; Song, Y.; Zhao, M.; Tsuge, T.; Aoyama, T.; Liu, J.; Gu, H.; *et al.* D-*myo*-inositol-3-phosphate affects phosphatidylinositol-mediated endomembrane function in *Arabidopsis* and is essential for auxin-regulated embryogenesis. *Plant Cell* **2011**, *23*, 1352–1372.
7. Yuan, F.; Zhao, H.; Ren, X.; Zhu, S.; Fu, X.; Shu, Q. Generation and characterization of two novel low phytate mutations in soybean (*Glycine max* L. Merr.). *Theor. Appl. Genet.* **2007**, *115*, 945–957.
8. Frank, T.; Nörenberg, S.; Engel, K.H. Metabolite profiling of two novel low phytic acid (*lpa*) soybean mutants. *J. Agric. Food Chem.* **2009**, *57*, 6408–6416.
9. Yuan, F.; Zhu, D.; Deng, B.; Fu, X.; Dong, D.; Zhu, S.; Li, B.; Shu, Q. Effects of two low phytic acid mutations on seed quality and nutritional traits in soybean (*Glycine max* L. Merr.). *J. Agric. Food Chem.* **2009**, *57*, 3632–3638.
10. Hitz, W.; Carlson, T.; Kerr, P.; Sebastian, S. Biochemical and molecular characterization of a mutation that confers a decreased raffinose and phytic acid phenotype on soybean seeds. *Plant Physiol.* **2002**, *128*, 650–660.
11. Meis, S.; Fehr, W.; Schnebly, S. Seed source effect on field emergence of soybean lines with reduced phytate and raffinose saccharides. *Crop Sci.* **2003**, *43*, 1336–1339.
12. Maupin, L.; Rosso, M.; Rainey, K. Environmental effects on soybean with modified phosphorus and sugar composition. *Crop Sci.* **2011**, *51*, 642–650.
13. Gao, Y.; Biyashev, R.; Maroof, M.; Glover, N.; Tucker, D.; Buss, G. Validation of low-phytate qtls and evaluation of seedling emergence of low-phytate soybeans. *Crop Sci.* **2008**, *48*, 1355–1364.
14. Nunes, A.; Vianna, G.; Cuneo, F.; Amaya-Farfan, J.; de Capdeville, G.; Rech, E.; Aragao, F. RNAi-mediated silencing of the *myo*-inositol-1-phosphate synthase gene (*GmMIPSI*) in transgenic soybean inhibited seed development and reduced phytate content. *Planta* **2006**, *224*, 125–132.



15. Keller, R.; Brearley, C.; Trethewey, R.; Muller-Rober, B. Reduced inositol content and altered morphology in transgenic potato plants inhibited for 1D-*myo*-inositol 3-phosphate synthase. *Plant J.* **1998**, *16*, 403–410.
16. Kuwano, M.; Mimura, T.; Takaiwa, F.; Yoshida, K. Generation of stable “low phytic acid” transgenic rice through antisense repression of the 1D-*myo*-inositol 3-phosphate synthase gene (*RINO1*) using the 18-kDa oleosin promoter. *Plant Biotechnol. J.* **2009**, *7*, 96–105.
17. Torabinejad, J.; Donahue, J.; Gunesequera, B.; Allen-Daniels, M.; Gillaspay, G. VTC4 is a bifunctional enzyme that affects *myo*-inositol and ascorbate biosynthesis in plants. *Plant Physiol.* **2009**, *150*, 951–961.
18. Dong, J.; Yan, W.; Bock, C.; Nokhrina, K.; Keller, W.; Georges, F. Perturbing the metabolic dynamics of *myo*-inositol in developing brassica napus seeds through *in vivo* methylation impacts its utilization as phytate precursor and affects downstream metabolic pathways. *BMC Plant Biol.* **2013**, *13*, 84, doi:10.1186/1471-2229-13-84.
19. Shi, J.; Wang, H.; Hazebroek, J.; Ertl, D.; Harp, T. The maize *low-phytic acid 3* encodes a *myo*-inositol kinase that plays a role in phytic acid biosynthesis in developing seeds. *Plant J.* **2005**, *42*, 708–719.
20. Liu, Q.; Xu, X.; Ren, X.; Fu, H.; Wu, D.; Shu, Q. Generation and characterization of low phytic acid germplasm in rice (*Oryza sativa* L.). *Theor. Appl. Genet.* **2007**, *114*, 803–814.
21. Frank, T.; Meuleye, B.; Miller, A.; Shu, Q.; Engel, K. Metabolite profiling of two low phytic acid (*lpa*) rice mutants. *J. Agric. Food Chem.* **2007**, *55*, 11011–11019.
22. Zhao, H.; Liu, Q.; Fu, H.; Xu, X.; Wu, D.; Shu, Q. Effect of non-lethal low phytic acid mutations on grain yield and seed viability in rice. *Field Crop. Res.* **2008**, *108*, 206–211.
23. Emami, K.; Morris, N.J.; Cockell, S.J.; Golebiowska, G.; Shu, Q.Y.; Gatehouse, A.M. Changes in protein expression profiles between a low phytic acid rice (*Oryza sativa* L. Ssp. Japonica) line and its parental line: A proteomic and bioinformatic approach. *J. Agric. Food Chem.* **2010**, *58*, 6912–6922.
24. Kim, S.; Andaya, C.; Newman, J.; Goyal, S.; Tai, T. Isolation and characterization of a low phytic acid rice mutant reveals a mutation in the rice orthologue of maize MIK. *Theor. Appl. Genet.* **2008**, *117*, 1291–1301.
25. Kim, S.; Tai, T. Genetic analysis of two *OsLpa1*-like genes in *Arabidopsis* reveals that only one is required for wild-type seed phytic acid levels. *Planta* **2010**, *232*, 1241–1250.
26. Stevenson-Paulik, J.; Bastidas, R.; Chiou, S.; Frye, R.; York, J. Generation of phytate-free seeds in *Arabidopsis* through disruption of inositol polyphosphate kinases. *Proc. Natl. Acad. Sci. USA* **2005**, *102*, 12612–12617.
27. Raboy, V.; Gerbasi, P.; Young, K.; Stoneberg, S.; Pickett, S.; Bauman, A.; Murthy, P.; Sheridan, W.; Ertl, D. Origin and seed phenotype of maize *low phytic acid 1-1* and *low phytic acid 2-1*. *Plant Physiol.* **2000**, *124*, 355–368.
28. Shi, J.; Wang, H.; Wu, Y.; Hazebroek, J.; Meeley, R.; Ertl, D. The maize low-phytic acid mutant *lpa2* is caused by mutation in an inositol phosphate kinase gene. *Plant Physiol.* **2003**, *131*, 507–515.
29. Kim, S.; Tai, T. Identification of novel rice low phytic acid mutations via TILLING by sequencing. *Mol. Breed.* **2014**, *34*, 1717–1729.

30. Kuo, H.; Chang, T.; Chiang, S.; Wang, W.; Charng, Y.; Chiou, T. *Arabidopsis* inositol pentakisphosphate 2-kinase, AtIPK1, is required for growth and modulates phosphate homeostasis at the transcriptional level. *Plant J.* **2014**, *80*, 503–515.
31. Lee, H.; Lee, D.; Cho, H.; Kim, S.; Auh, J.; Pai, H. InsP<sub>6</sub>-sensitive variants of the Gle1 mRNA export factor rescue growth and fertility defects of the *ipk1 low-phytic-acid* mutation in *Arabidopsis*. *Plant Cell* **2015**, *27*, 417–431.
32. Shukla, S.; VanToai, T.; Pratt, R. Expression and nucleotide sequence of an ins (3) p-1 synthase gene associated with low-phytate kernels in maize (*Zea mays* L.). *J. Agric. Food Chem.* **2004**, *52*, 4565–4570.
33. Ali, N.; Paul, S.; Gayen, D.; Sarkar, S.; Datta, K.; Datta, S. Development of low phytate rice by rna1 mediated seed-specific silencing of inositol 1,3,4,5,6-pentakisphosphate 2-kinase gene (*IPK1*). *PLoS ONE* **2013**, *8*, doi:10.1371/journal.pone.0068161.
34. Gaedeke, N.; Klein, M.; Kolukisaoglu, U.; Forestier, C.; Muller, A.; Ansonge, M.; Becker, D.; Mamnun, Y.; Kuchler, K.; Schulz, B.; *et al.* The *Arabidopsis thaliana* ABC transporter AtMRP5 controls root development and stomata movement. *EMBO J.* **2001**, *20*, 1875–1887.
35. Klein, M.; Perfus-Barbeoch, L.; Frelet, A.; Gaedeke, N.; Reinhardt, D.; Mueller-Roeber, B.; Martinoia, E.; Forestier, C. The plant multidrug resistance ABC transporter AtMRP5 is involved in guard cell hormonal signalling and water use. *Plant J.* **2003**, *33*, 119–129.
36. Suh, S.J.; Wang, Y.F.; Frelet, A.; Leonhardt, N.; Klein, M.; Forestier, C.; Mueller-Roeber, B.; Cho, M.H.; Martinoia, E.; Schroeder, J.I. The ATP binding cassette transporter AtMRP5 modulates anion and calcium channel activities in *Arabidopsis* guard cells. *J. Biol. Chem.* **2007**, *282*, 1916–1924.
37. Lee, E.; Kwon, M.; Ko, J.; Yi, H.; Hwang, M.; Chang, S.; Cho, M. Binding of sulfonylurea by AtMRP5, an *Arabidopsis* multidrug resistance-related protein that functions in salt tolerance. *Plant Physiol.* **2004**, *134*, 528–538.
38. Nagy, R.; Grob, H.; Weder, B.; Green, P.; Klein, M.; Frelet-Barrand, A.; Schjoerring, J.; Brearley, C.; Martinoia, E. The *Arabidopsis* ATP-binding cassette protein AtMRP5/AtABCC5 is a high affinity inositol hexakisphosphate transporter involved in guard cell signaling and phytate storage. *J. Biol. Chem.* **2009**, *284*, 33614–33622.
39. Steger, D.; Haswell, E.; Miller, A.; Went, S.; O’Shea, E. Regulation of chromatin remodeling by inositol polyphosphates. *Science* **2003**, *299*, 114–116.
40. Wilcox, J.; Premachandra, G.; Young, K.; Raboy, V. Isolation of high seed inorganic P, low-phytate soybean mutants. *Crop Sci.* **2000**, *40*, 1601–1605.
41. Oltmans, S.; Fehr, W.; Welke, G.; Raboy, V.; Peterson, K. Agronomic and seed traits of soybean lines with low-phytate phosphorus. *Crop Sci.* **2005**, *45*, 593–598.
42. Hulke, B.; Fehr, W.; Welke, G. Agronomic and seed characteristics of soybean with reduced phytate and palmitate. *Crop Sci.* **2004**, *44*, 2027–2031.
43. Pilu, R.; Panzeri, D.; Cassani, E.; Cerino Badone, F.; Landoni, M.; Nielsen, E. A paramutation phenomenon is involved in the genetics of maize low phytic acid1-241 (*lpa1-241*) trait. *Heredity* **2009**, *102*, 236–245.
44. Panzeri, D.; Cassani, E.; Doria, E.; Tagliabue, G.; Forti, L.; Campion, B.; Bollini, R.; Brearley, C.A.; Pilu, R.; Nielsen, E.; *et al.* A defective ABC transporter of the MRP family, responsible for the

- bean *lpa1* mutation, affects the regulation of the phytic acid pathway, reduces seed *myo*-inositol and alters *aba* sensitivity. *New Phytol.* **2011**, *191*, 70–83.
45. Pilu, R.; Panzeri, D.; Gavazzi, G.; Rasmussen, S.; Consonni, G.; Nielsen, E. Phenotypic, genetic and molecular characterization of a maize low phytic acid mutant (*lpa241*). *Theor. Appl. Genet.* **2003**, *107*, 980–987.
  46. Pilu, R.; Landoni, M.; Cassani, E.; Doria, E.; Nielsen, E. The maize *lpa241* mutation causes a remarkable variability of expression and some pleiotropic effects. *Crop Sci.* **2005**, *45*, 2096–2105.
  47. Cerino Badone, F.; Amelotti, M.; Cassani, E.; Pilu, R. Study of low phytic acid1-7 (*lpa1-7*), a new *ZmMRP4* mutation in maize. *J. Hered.* **2012**, *103*, 598–605.
  48. Doria, E.; Galleschi, L.; Calucci, L.; Pinzino, C.; Pilu, R.; Cassani, E.; Nielsen, E. Phytic acid prevents oxidative stress in seeds: Evidence from a maize (*Zea mays* L.) low phytic acid mutant. *J. Exp. Bot.* **2009**, *60*, 967–978.
  49. Cerino Badone, F.; Cassani, E.; Landoni, M.; Doria, E.; Panzeri, D.; Lago, C.; Mesiti, F.; Nielsen, E.; Pilu, R. The low phytic acid1-241 (*lpa1-241*) maize mutation alters the accumulation of anthocyanin pigment in the kernel. *Planta* **2010**, *231*, 1189–1199.
  50. Landoni, M.; Cerino Badone, F.; Haman, N.; Schiraldi, A.; Fessas, D.; Cesari, V.; Toschi, I.; Cremona, R.; Delogu, C.; Villa, D.; *et al.* Low phytic acid 1 mutation in maize modifies density, starch properties, cations, and fiber contents in the seed. *J. Agric. Food Chem.* **2013**, *61*, 4622–4630.
  51. Shi, J.; Wang, H.; Schellin, K.; Li, B.; Faller, M.; Stoop, J.; Meeley, R.; Ertl, D.; Ranch, J.; Glassman, K. Embryo-specific silencing of a transporter reduces phytic acid content of maize and soybean seeds. *Nat. Biotech.* **2007**, *25*, 930–937.
  52. Liu, Z.; Cheng, F.; Cheng, W.; Zhang, G. Positional variations in phytic acid and protein content within a panicle of japonica rice. *J. Cereal Sci.* **2005**, *41*, 297–303.
  53. Naidoo, R.; Tongoona, P.; Derera, J.; Laing, M.; Watson, G. Combining ability of low phytic acid (*lpa1-1*) and quality protein maize (qpm) lines for seed germination and vigour under stress and non-stress conditions. *Euphytica* **2012**, *185*, 529–541.
  54. Xu, X.; Zhao, H.; Liu, Q.; Frank, T.; Engel, K.; An, G.; Shu, Q. Mutations of the multi-drug resistance-associated protein ABC transporter gene 5 result in reduction of phytic acid in rice seeds. *Theor. Appl. Genet.* **2009**, *119*, 75–83.
  55. Zhang, W.; Gruszewski, H.; Chevone, B.; Nessler, C. An arabidopsis purple acid phosphatase with phytase activity increases foliar ascorbate. *Plant Physiol.* **2008**, *146*, 431–440.
  56. Bregitzer, P.; Raboy, V. Effects of four independent low-phytate mutations on barley agronomic performance. *Crop Sci.* **2006**, *46*, 1318–1322.
  57. Raboy, V.; Peterson, K.; Jackson, C.; Marshall, J.; Hu, G.; Saneoka, H.; Bregitzer, P. A substantial fraction of barley (*Hordeum vulgare* L.) low phytic acid mutations have little or no effect on yield across diverse production environments. *Plants* **2015**, *4*, 225–239.
  58. Karner, U.; Peterbauer, T.; Raboy, V.; Jones, D.; Hedley, C.; Richter, A. Myo-inositol and sucrose concentrations affect the accumulation of raffinose family oligosaccharides in seeds. *J. Exp. Bot.* **2004**, *55*, 1981–1987.
  59. Dorsch, J.; Cook, A.; Young, K.; Anderson, J.; Bauman, A.; Volkmann, C.; Murthy, P.; Raboy, V. Seed phosphorus and inositol phosphate phenotype of barley low phytic acid genotypes. *Phytochemistry* **2003**, *62*, 691–706.

60. Ye, H.; Zhang, X.; Broughton, S.; Westcott, S.; Wu, D.; Lance, R.; Li, C. A nonsense mutation in a putative sulphate transporter gene results in low phytic acid in barley. *Funct. Integr. Genom.* **2011**, *11*, 103–110.
61. Rehman, A.; Shunmugam, A.; Arganosa, G.; Bett, K.; Warkentin, T. Inheritance of the low-phytate trait in pea. *Crop Sci.* **2012**, *52*, 1171–1175.
62. Shunmugam, A.S.K.; Bock, C.; Arganosa, G.C.; Georges, F.; Gray, G.R. and Warkentin, T.D. Accumulation of phosphorus-containing compounds in developing seeds of low-phytate pea (*Pisum sativum* L.) mutants. *Plants* **2015**, *4*, 1–26.
63. Raboy, V. Myo-inositol-1,2,3,4,5,6-hexakisphosphate. *Phytochemistry* **2003**, *64*, 1033–1043.

© 2015 by the authors; licensee MDPI, Basel, Switzerland. This article is an open access article distributed under the terms and conditions of the Creative Commons Attribution license (<http://creativecommons.org/licenses/by/4.0/>).
